# Supplementary material for: High Fat High Sucrose Diet Modifies Uterine Contractility and Cervical Resistance in Pregnant Rats: The Roles of Sex Hormones, Adipokines and Cytokines
Source: MDPI journal article supplement (doi:10.3390/life12060794), 2022-05-26
Supplement: s1 [file s1]

**Figure S1. Full gel photos of adipokines Western blot measurements.**

### KissR

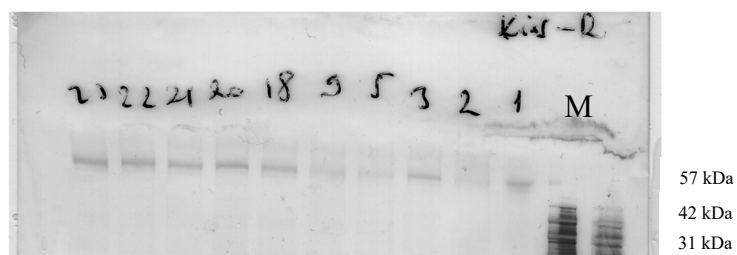

### Actin

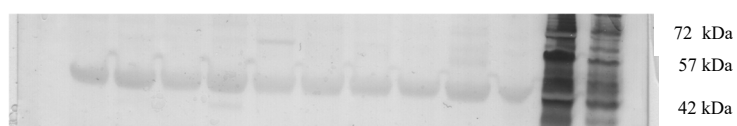

Lanes 1, 2, 3, 5, 9: the numbers of standard diet rats

Lanes 18, 20, 21, 22, 23: the numbers of standard diet rats

M: molecular weight markers

### Ob-R/Leptin receptor:

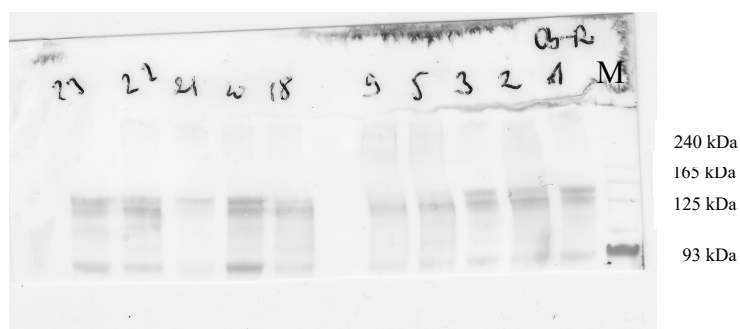

### Actin

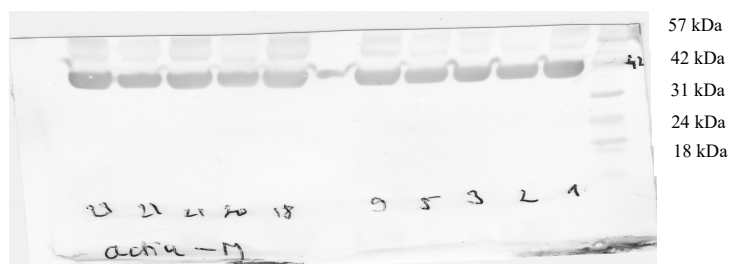

Lanes 1, 2, 3, 5, 9: numbers of standard diet rats

Lanes 18, 20, 21, 22, 23: numbers of standard diet rats

M: molecular weight markers

## Adiponectin 1 receptor

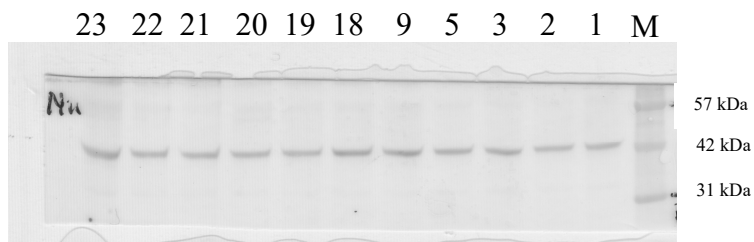

## Actin

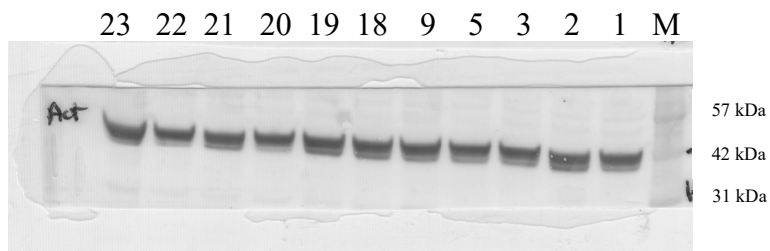

Lanes 1, 2, 3, 5, 9: the number of standard diet rats

Lanes 18, 19, 20, 21, 22, 23: the number of standard diet rats

M: molecular weight markers

## Adiponectin 2 receptor

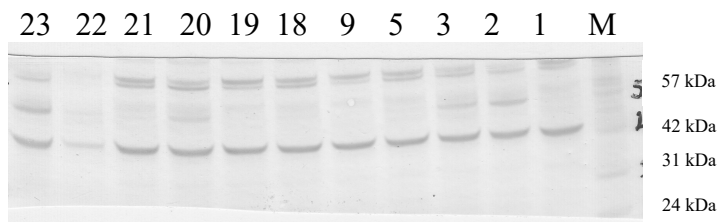

## Actin

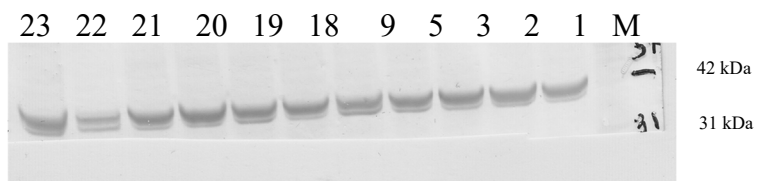

Lane 1, 2, 3, 5, 9: the number of standard diet rats

Lane 18, 19, 20, 21, 22, 23: the number of standard diet rats

M: molecular weight markers
